# Supplementary material for: Phosphatidylinositol 3-kinase p110δ expression in Merkel cell carcinoma
Source: PubMed Central journal article supplement (PMC6049866; doi:10.18632/oncotarget.25619), 2018-07-03
Supplement: oncotarget-09-29565-s001.pdf [file oncotarget-09-29565-s001.pdf]

## Phosphatidylinositol 3-kinase p110 $\delta$ expression in Merkel cell carcinoma

### SUPPLEMENTARY MATERIALS

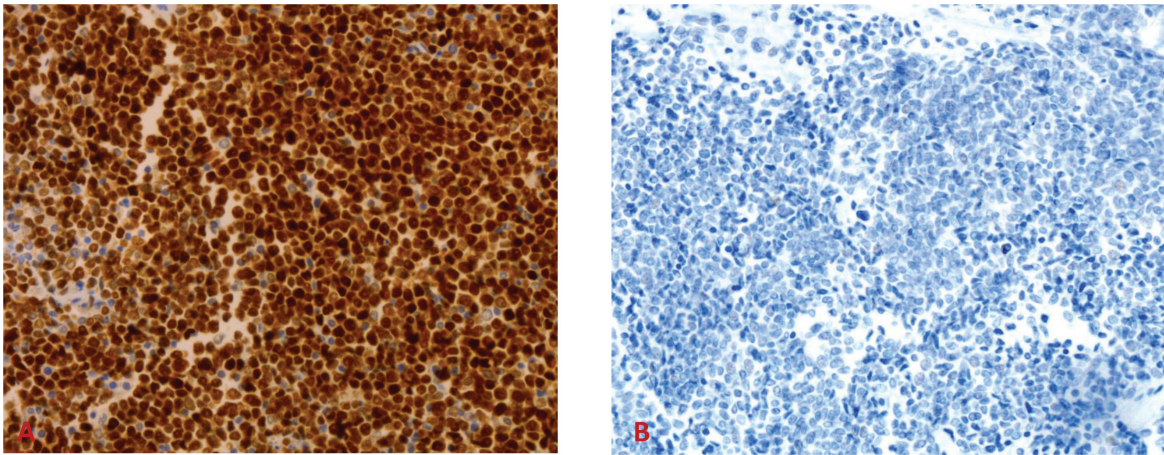

**Supplementary Figure 1:** MCPyV IHC of ID3 (A) and ID8 (B). ID1 MCC cells showing a specific and distinct nuclear expression of the MCPyV LT antigen (A) whereas, ID2 MCC cells were negative for MCPyV.
